# Supplementary material
Source: ML conference proceedings conference paper supplement (https://proceedings.mlr.press/v54/cowley17a.html)
Supplement: Supplementary file [file cowley17a-supp.pdf]

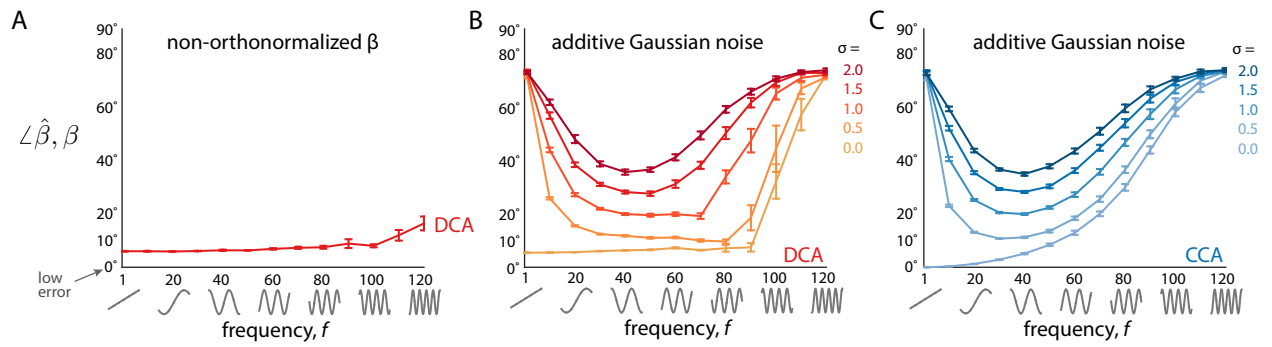

Supplementary Figure 1: Results of modified testbeds for identifying dimensions for two sets of variables (Section 6.2). (A) DCA shows low error (measured by angle of overlap) across many frequencies for non-orthonormalized  $\beta$ . The same testbed was used as that in Section 6.2, except that the columns of  $\beta = [\beta_1, \dots, \beta_5]$  were not orthonormalized. To ensure  $\beta_i^T X \in [-\frac{\pi}{4}, \frac{\pi}{4}]$ , each  $\beta_i$  was normalized to have a norm of 1. (B) DCA's performance decays gradually in the presence of additive Gaussian noise. The same testbed was used as that in Section 6.2, except that we corrupted  $Y$  with additive Gaussian noise:  $Y = [\tilde{y}_1, \dots, \tilde{y}_5]^T$ , where  $\tilde{y}_i = y_i + \sigma\epsilon$  and  $\epsilon \sim \mathcal{N}(0, 1)$ . We varied  $\sigma$  between 0 and 2.0. (C) CCA's performance decays in a similar manner as that of DCA. Same testbed as in (B).
